# Supplementary material for: Adsorption and activity of cytochrome c on mesoporous silicates
Source: Royal Society of Chemistry journal article supplement (doi:10.1039/b009478l), 2001-01-01
Supplement: b009478l.doc [file b009478l.doc]

**Experimental Details**

CNS was synthesised by mixing 50 g cetyltrimethyl ammonium bromide (CTAB) (Sigma, 99%) with 450 g of H2O. This solution was heated to 30°C until all of the surfactant was dissolved after which 50 ml tetraethoxysilane (TEOS) (Lancaster, 98%), 6.25 ml 2-cyanoethyltriethoxysilane (CEOS) (Lancaster, 98%) and 2.5 ml NH3 (37% w/v) (Aldrich) were added. The gel mixture which formed was heated to 105°C and maintained at this temperature for 24 hours. In order to remove the surfactant, the mixture was refluxed in 500 ml of methanol solution containing 1.5% HCl, 2.5% H2O12 for 2 hours. The methanol solution was then replaced with a fresh solution and the process repeated 4 times, refluxing for 3, 4, 5 and 6 hours respectively. MCM-41 was synthesised by mixing 10 g CTAB, 1 g NaOH and 90 g H2O at 35°C. After the surfactant had dissolved, 9 ml of TEOS and 2.5 ml of CEOS were added and the solution stirred at 35°C for 30 minutes. The resultant mixture was then heated to 150°C and maintained at this temperature for 24 hours. The product was filtered and added to 200 ml H2O, followed by stirring and heated to 70°C (10 minutes). The surfactant was removed by calcination at 650°C for 6 hours.15 MPS-F127 was synthesised using the triblock copolymer Pluronic-F127 (EO106PO70EO106) (BASF) as the structure directing agent, according to the method of Zhao et al.2 with minor modifications. The silicate was prepared by stirring 1 g of Pluronic-F127, 7.5 g H2O and 30 g of 2 M HCl at room temperature. When the surfactant was dissolved, 2.28 ml of TEOS was added and the solution stirred for 24 hours at room temperature. The gel which was formed was then aged at 80°C overnight. The product was washed (4 x 200 ml of methanol) and calcined by heating at 500°C for 6 hours. All of the silicates were characterised by nitrogen gas adsorption/desorption isotherms at 77 K measured using a Micromeritics Gemini ASAP 2000 system. Samples were pre-treated at 150°C for 1 hour. The pore size data were analysed by the thermodynamic based Barrett-Joyner-Halenda (BJH)16 method using the desorption branch of the isotherm. The physicochemical properties of the MPS materials are presented in Table 1 and the pore size distributions in Fig. 1.

The adsorption experiments were carried out at 25°C in 25 mM phosphate buffer pH 6.5, with no stirring. Adsorption was initiated by adding known quantities of an MPS to varied cytochrome c concentrations (e.g. 0.5 ml of a 2 mg ml-1 CNS suspension was added to a range of 0.5 ml cytochrome c solutions, with the cytochrome c concentrations varied between 2.914.3 M). Adsorption was allowed to proceed for 15 minutes (CNS and MPS-F127), and 16 hours (COS and MCM-41). In each case, sufficient time was allowed for adsorption to go to completion. The concentration of protein in solution was determined by monitoring the absorbance at 407 nm (m = 100,000 M-1cm-1).10

MPS with adsorbed cytochrome c were assayed for peroxidative activity using 2,2’-azino(bis(3-ethylbenzthiazoline-6-sulfonic acid) (ABTS) (Sigma) in the presence of H2O2 (Merck).17 Reduction of ABTS was followed spectrophotometrically at 405 nm (m = 36,800 M-1cm-1). Assay mixtures contained 2 mg silicate, 0.3 ml of a 1 g L-1 ABTS solution and 0.3 ml of 25 mM H2O2 solution. All reagents were made up in 25 mM phosphate buffer, pH 6.5. Silicates with no protein adsorbed were found to exhibit no peroxidative activity towards ABTS. Hydrogen peroxide and ABTS were also investigated separately to ascertain what effect these would have on the adsorbed protein. Hydrogen peroxide was found to have no apparent effect on the adsorbed protein, while ABTS was found to desorb small quantities of the cytochrome c from the silicate into solution. The amount desorbed, ranging from 2-15%, depending on the protein loading, was determined spectrophotometrically.11

15. A. Doyle; B.K. Hodnett; (to be submitted).

16. E.P. Barrett; L.G. Joyner; P.P. Halenda, *J. Am. Chem. Soc.* 1951, **73**, 373.

17. G. Presnova; V. Grigarenko; A. Egonov; T. Ruzgas; A. Lindgren; L. Gorton;

T. Börchers, *Faraday Discuss.* 2000, **116**, 281.
